# Supplementary material for: Stool substitute transplant therapy for the eradication of Clostridium difficile infection: ‘RePOOPulating’ the gut
Source: PubMed Central journal article supplement (PMC3869191; doi:10.1186/2049-2618-1-3), 2013-01-09

Patient 1

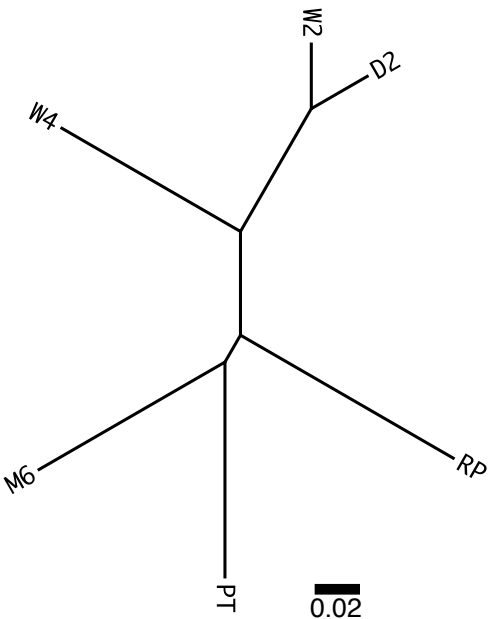

Patient 2

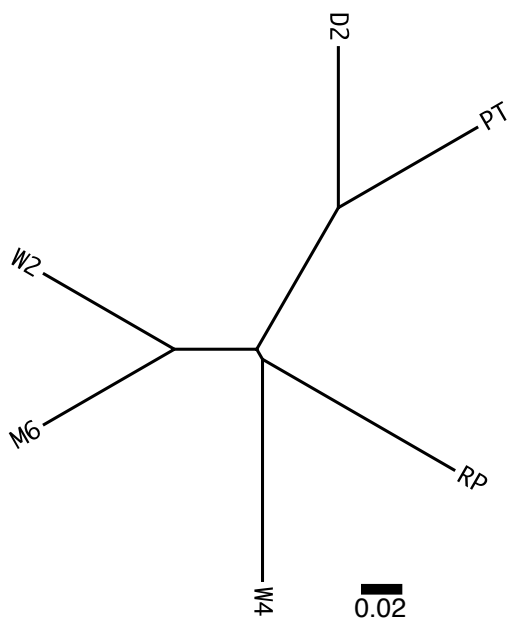

Supplement: 2049-2618-1-3-S1.pdf [file 2049-2618-1-3-S1.pdf]
